# Supplementary material
Source: PubMed Central journal article supplement (PMC8191498)
Supplement: NIHMS1709599-supplement-SI.pdf [file NIHMS1709599-supplement-SI.pdf]

## SUPPORTING INFORMATION

## “Three-Dimensional Hybridization” with Polyvalent DNA-Gold Nanoparticle Conjugates

Sarah J. Hurst, Haley D. Hill, and Chad A. Mirkin\*

Department of Chemistry and International Institute for Nanotechnology,  
Northwestern University, 2145 Sheridan Rd., Evanston, IL 60208-3113,

\*chadnano@northwestern.edu

## Supporting Information 1

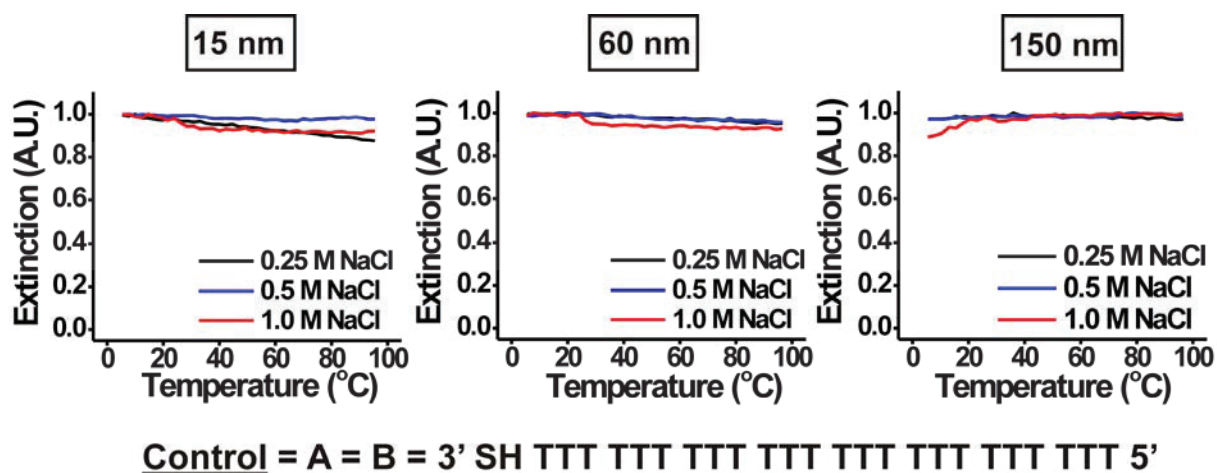

**Figure S1.** Normalized melting curves (monitored at 260 nm) for 15, 60, and 150 nm DNA-Au NPs functionalized with a control poly-T DNA sequence at 0.25 M, 0.5 M, or 1.0 M NaCl.

## Supporting Information 2

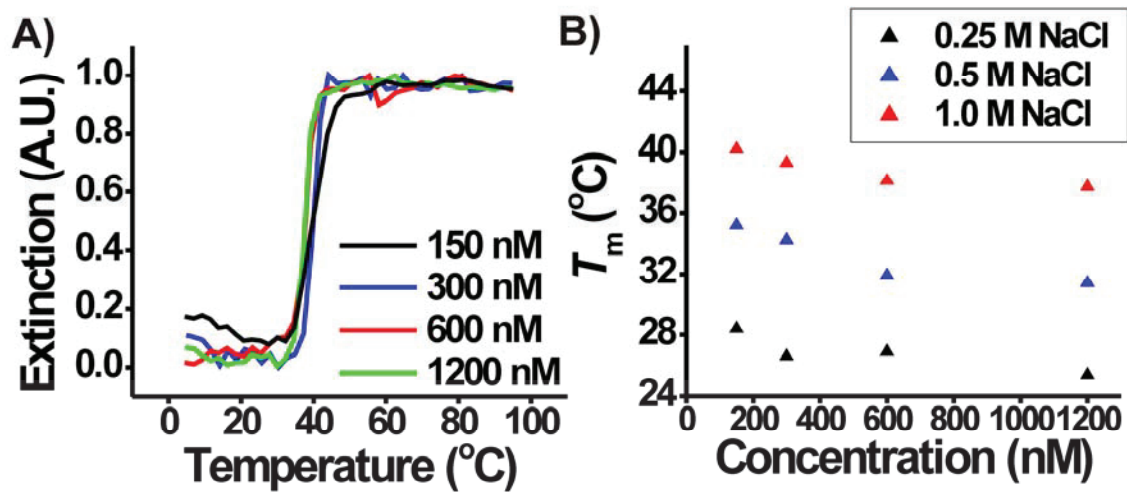

**Figure S2. A)** Normalized melting curves (monitored at 260 nm) for 15 nm DNA-Au NP aggregates at 1.0 M NaCl for 4 different concentrations (150, 300, 600, 1200 nM) of nanoparticle-bound DNA. **B)** Graph of  $T_m$  (°C) vs. nanoparticle-bound DNA concentration (nM) for 15 nm DNA-Au NPs at 0.25 M, 0.5 M, and 1.0 M NaCl. Note that the  $T_m$  of the DNA-Au NPs does not change significantly with nanoparticle-bound DNA concentration. All melting information is for the 3 BP DNA sequence.

## Supporting Information 3

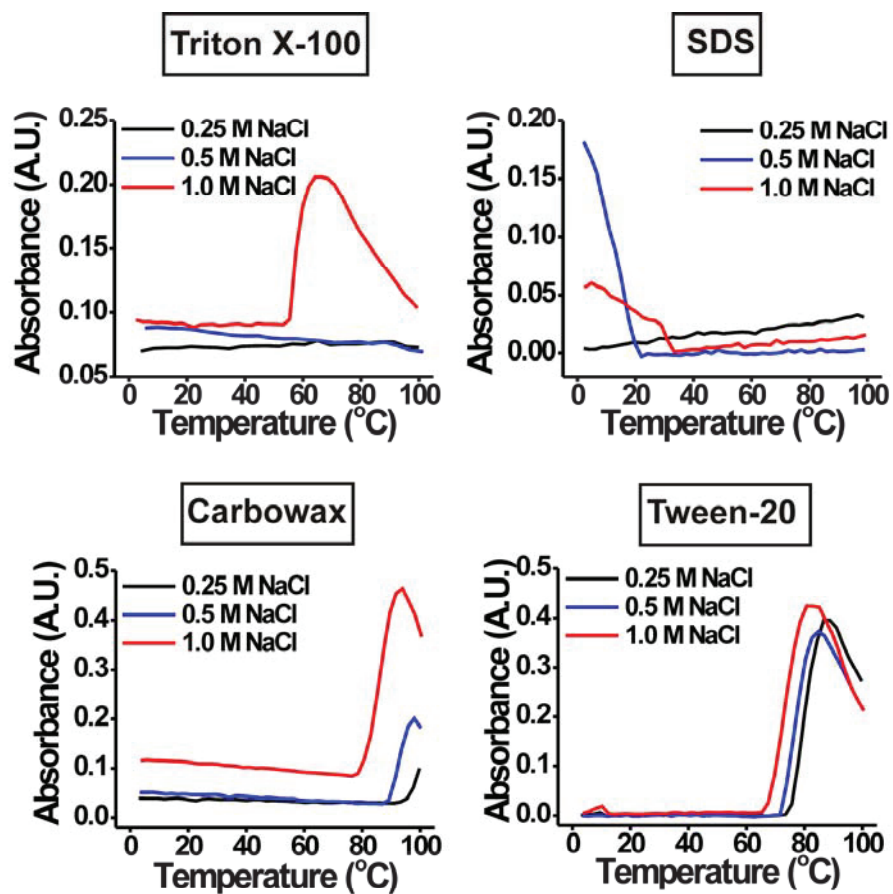

**Figure S3.** Temperature profiles (monitored at 260 nm) for dilute (0.01 %) aqueous solutions of Triton<sup>®</sup> X-100, SDS, Carbowax, or Tween-20 in 0.25 M, 0.5 M, and 1.0 M NaCl.

## Supporting Information 4

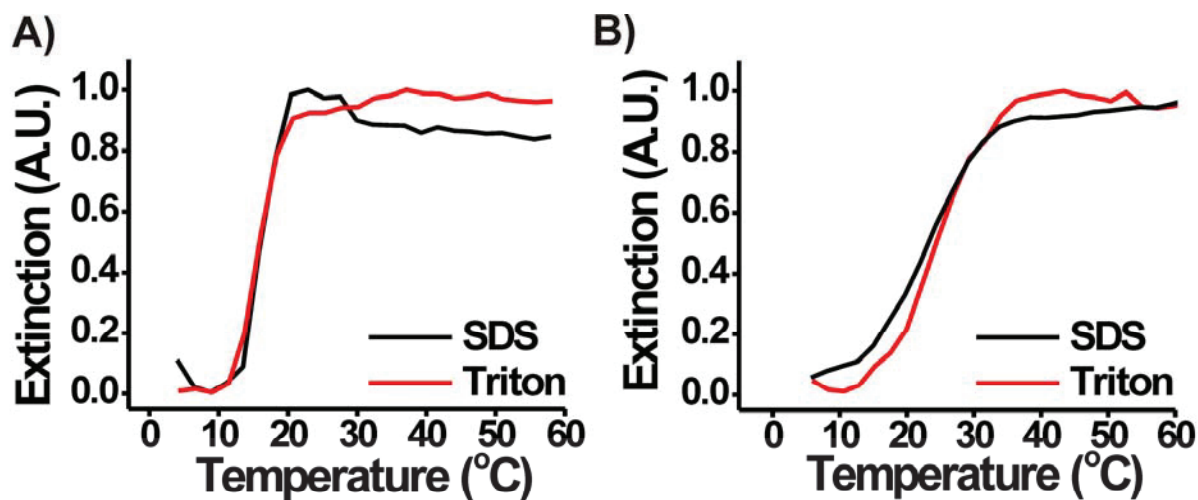

**Figure S4.** Normalized melting curves (monitored at 260 nm) for 60 nm DNA-Au NP aggregates at 1.0 M NaCl using either 0.01 % SDS or 0.01 % Triton<sup>®</sup> X-100 as a surfactant. Melting information is for 2 BP DNA sequence with either a **A)** poly-T or **B)** PEG spacer. Note that the  $T_m$  of the DNA-Au NPs does not change significantly with the type of surfactant. In **A)**, the  $T_m$  of the DNA-Au NP aggregates is 16.3 °C and 15.6 °C for SDS and Triton<sup>®</sup> X-100, respectively. In **B)**, the  $T_m$  of the DNA-Au NP aggregates is 23.1 °C and 24.4 °C for SDS and Triton<sup>®</sup> X-100, respectively.

## Supporting Information 5

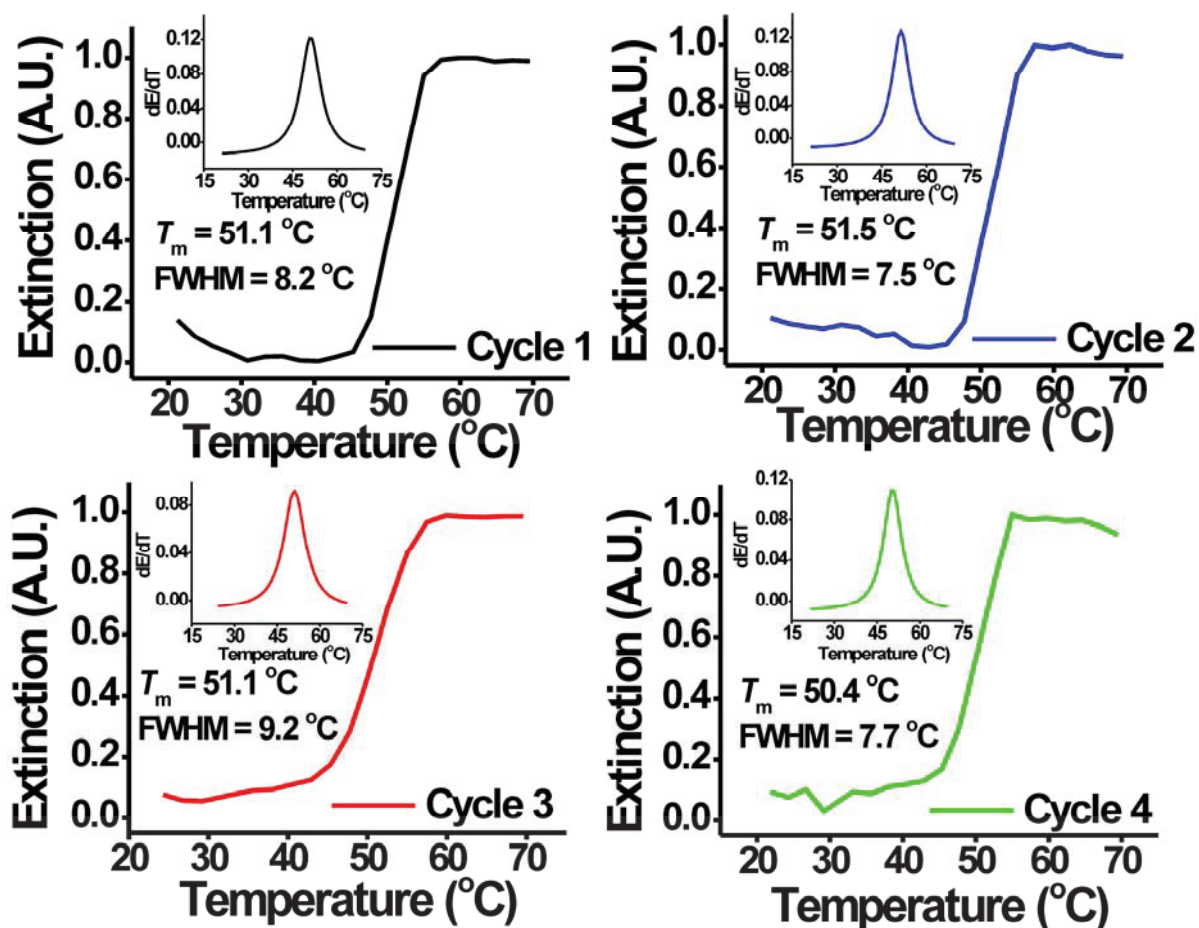

**Figure S5.** Melting transitions (monitored at 260 nm) for the same sample of 60 nm DNA-Au NP aggregates cycled repeatedly. The salt concentration is 1.0 M NaCl and the 3 BP DNA sequence was used. The inset in each graph shows the Lorentzian fit to the first derivative of the melting transition. The  $T_m$  and the FWHM of each curve is listed. Note that the values for the  $T_m$  do not change significantly over four cycles, indicating the stability of the DNA-Au NPs to heat and degradation in aqueous media. The same trend was observed for 2 BP using 60 nm nanoparticles.

## Supporting Information 6

|        | $T_m$ (°C) |       |       |        |       |       |        |       |       |
|--------|------------|-------|-------|--------|-------|-------|--------|-------|-------|
|        | 1 BP       |       |       | 2 BP   |       |       | 3 BP   |       |       |
|        | 0.25 M     | 0.5 M | 1.0 M | 0.25 M | 0.5 M | 1.0 M | 0.25 M | 0.5 M | 1.0 M |
| 15 nm  | X          | X     | X     | X      | X     | X     | 25.4   | 31.4  | 37.7  |
| 30 nm  | X          | X     | X     | X      | X     | X     | 31.2   | 40.5  | 46.8  |
| 60 nm  | X          | X     | X     | X      | X     | 15.6  | 34.0   | 45.4  | 54.1  |
| 80 nm  | X          | X     | X     | X      | 11.2  | 22.6  | 35.5   | 48.4  | 58.7  |
| 150 nm | X          | X     | 18.2  | X      | 13.1  | 28.2  | 42.9   | 51.2  | 63.8  |

Figure S6. Melting temperatures for all DNA-Au NPs.

## Supporting Information 7

|        | FWHM (°C) |       |       |        |       |       |        |       |       |
|--------|-----------|-------|-------|--------|-------|-------|--------|-------|-------|
|        | 1 BP      |       |       | 2 BP   |       |       | 3 BP   |       |       |
|        | 0.25 M    | 0.5 M | 1.0 M | 0.25 M | 0.5 M | 1.0 M | 0.25 M | 0.5 M | 1.0 M |
| 15 nm  | X         | X     | X     | X      | X     | X     | 4.2    | 4.1   | 4.2   |
| 30 nm  | X         | X     | X     | X      | X     | X     | 0.9    | 1.6   | 3.7   |
| 60 nm  | X         | X     | X     | X      | X     | 5.9   | 0.7    | 2.4   | 4.3   |
| 80 nm  | X         | X     | X     | X      | 5.9   | 6.7   | 3.5    | 4.6   | 5.1   |
| 150 nm | X         | X     | 17.3  | X      | 9.5   | 15.7  | 3.8    | 5.5   | 18.0  |

Figure S7. FWHMs for all DNA-Au NPs. These values generally increase with increasing salt concentration and nanoparticle size and decrease with increasing number of base pairings.

## Supporting Information 8

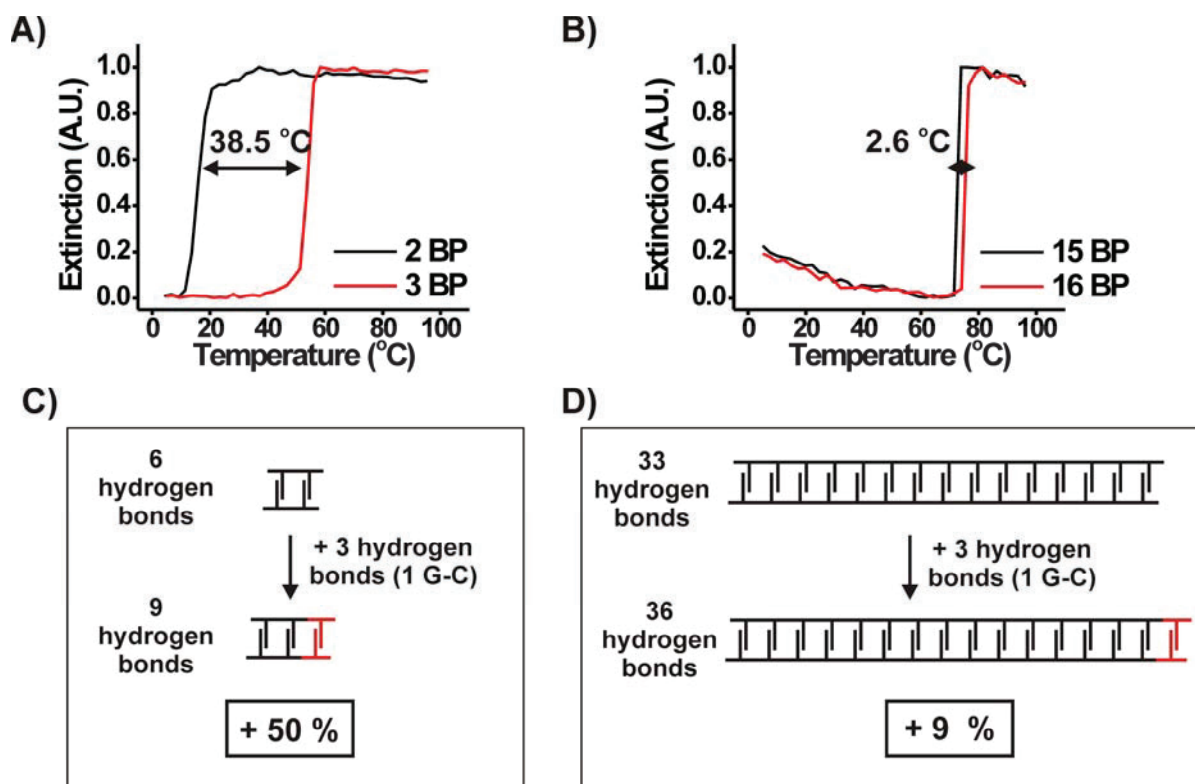

**Figure S8.** Melting transitions for 60 nm DNA-Au NP aggregates in 1.0 M NaCl. **A)** Melting transitions (monitored at 260 nm) for 2 BP and 3 BP. **B)** Melting transitions (monitored at 260 nm) for complementary 15-mer DNA (A = 5' SH A<sub>10</sub> ATC CTT TAC AAT ATT 3', B = 5' SH A<sub>10</sub> AAT ATT GTA AAG GAT 3') and complementary 16-mer DNA (A = 5' SH A<sub>10</sub> ATC CTT TAC AAT ATT C 3', B = 5' SH A<sub>10</sub> G AAT ATT GTA AAG GAT 3'). **C)** and **D)** depict the relative percent increase in the number of potential hydrogen bonds per connection (50 % and 9 %) by adding one additional G-C pair (3 hydrogen bonds) to a 2 BP and 15 BP duplex DNA sequence, respectively. These respective increases in melting temperature as a result of these additions are 38.5 °C and 2.6 °C.

## Supporting Information 9

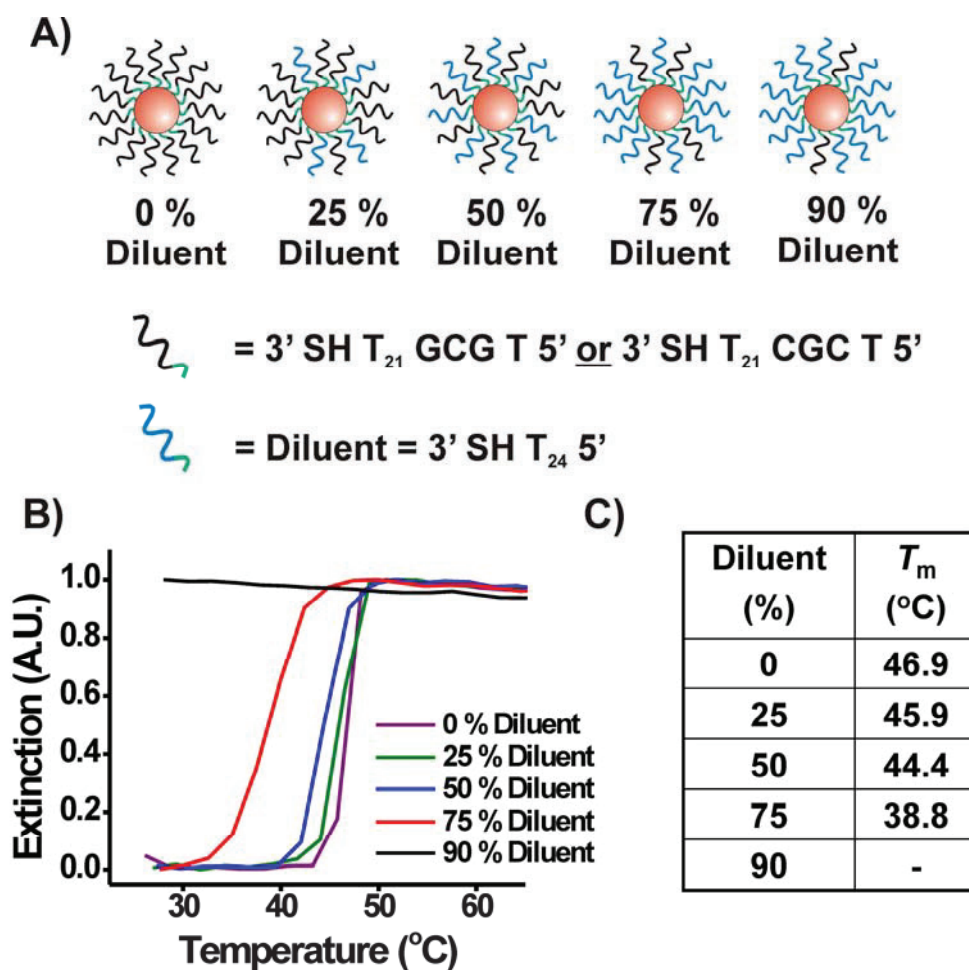

**Figure S9.** **A)** Schematic showing the relative coverage of the diluent DNA strand and the complementary DNA strand on the surface of the gold nanoparticle. **B)** Melting transitions (monitored at 260 nm) for 60 nm DNA-Au NPs with different concentrations of diluent strands on their surfaces (0.5 M NaCl, 10 mM PB, 0.01 % SDS). **C)** Melting temperatures corresponding to the curves shown in **B)**.



### Calculation of Equilibrium Binding Constants ( $K_{eq}$ )

The equilibrium constants ( $K_{eq}$ ) for the DNA-Au NP systems were calculated using the theoretical model outlined in Ref. 12. Briefly, the total enthalpy of the system ( $\Delta H_{tot}$ ) was determined by fitting the experimental melting curves to

$$f = 1/[1 + \exp[(\Delta H_{tot}/R)*((1/T)-(1/T_m))]],$$

where  $f$  is the fraction of the total aggregate in the dispersed state,  $R$  is the universal gas constant, and  $T_m$  is the measured melting temperature. Then, since

$$K_{eq} = \exp[(\Delta H_{tot}/R)*((1/T)-(1/T_m))],$$

the values of  $\Delta H_{tot}$  (fitted) and the  $T_m$  (measured) could be used to calculate  $K_{eq}$  at a given temperature  $T$  (298 K). Supporting Table 1 shows the  $\Delta H_{tot}$  and  $K_{eq}$  values obtained using this method for 15 nm DNA-Au NPs (0.25 and 1.0 M NaCl), 60 nm DNA-Au NPs (0.25 M NaCl) and 150 nm DNA-Au NPs (0.25 M NaCl) at 298 K. The melting temperatures used for these calculations are listed in Figure S6.

| <b>Supporting Table 1</b> |               | <b><math>\Delta H_{tot}</math> (kcal/mol)</b> | <b><math>K_{eq}</math></b> |
|---------------------------|---------------|-----------------------------------------------|----------------------------|
| <b>15 nm DNA-Au NPs</b>   | <b>0.25 M</b> | -311.1                                        | $2 \times 10^0$            |
|                           | <b>1.0 M</b>  | -138.5                                        | $1.4 \times 10^4$          |
| <b>60 nm DNA-Au NPs</b>   | <b>0.25 M</b> | -290.2                                        | $2 \times 10^6$            |
| <b>150 nm DNA-Au NPs</b>  | <b>0.25 M</b> | -215.2                                        | $9 \times 10^8$            |

To calculate the  $K_{eq}$  for the free DNA system, the thermodynamic values determined by Honda et al (Ref. 29) were used (Supporting Table 2).

| <b>Supporting Table 2</b>  | <b><math>\Delta H^\circ</math> (kcal/mol)</b> | <b><math>\Delta S^\circ</math> (cal/mol•K)</b> |
|----------------------------|-----------------------------------------------|------------------------------------------------|
| <b>dGC/dCG</b>             | -10.5                                         | -26.4                                          |
| <b>dCG/dGC</b>             | -11.8                                         | -29.0                                          |
| <b>Initiation Penalty</b>  | 0.6                                           | -9.0                                           |
| <b>Total for free 3 BP</b> | -21.7                                         | -64.4                                          |

We then calculated  $\Delta G$  using the Gibbs free energy equation:

$$\Delta G^\circ = \Delta H^\circ + T \Delta S^\circ,$$

where  $\Delta G^\circ$  is the free energy of the system,  $\Delta H^\circ$  is the enthalpy of the system, and  $\Delta S^\circ$  is the entropy of the system at a given  $T$  (298 K). This calculation gave us a value of  $\Delta G^{\circ free} = -2.5 \times 10^3$  cal/mol for free 3 BP (1.0 M NaCl, 298 K). We then calculated the equilibrium binding constant using the following equation:

$$K_{eq} = \exp(\Delta G/-RT).$$

This calculation resulted in a value of  $K_{\text{eq}}^{\text{free}} = 7 \times 10^1$  for free 3 BP (1.0 M NaCl, 298 K). Since this value is greater than unity, it suggests that this sequence will form at room temperature under these conditions. However, we have not observed this hybridization/melting behavior experimentally. Likely, this method is overestimating the stability of free 3 BP duplexes. As a result, this might suggest that the differences between the free DNA and DNA-Au NP systems are even larger than we predict here.
